# Supplementary material for: Pleiotropic functions of catabolite control protein CcpA in Butanol-producing Clostridium acetobutylicum
Source: PubMed Central journal article supplement (PMC3507653; doi:10.1186/1471-2164-13-349), 2012-07-30

**Additional file 1.** Comparison of the expression levels of the CcpA-repressed genes involved in carbohydrates metabolism in *C. acetobutylicum* ATCC 824 (824WT) in the presence (time point S in figure A) and absence of D-glucose (S2 and S3 in figure A). (A) Growth and sugar consumption of 824WT in fermenting D-glucose and D-xylose. Triangle, growth (A600); diamond, D-glucose concentration; square, D-xylose concentration. (B) Comparison of the expression level of CcpA-repressed genes involved in carbohydrates metabolism in the presence and absence of D-glucose. Most of the CcpA-repressed genes exhibited significant upregulation when D-glucose was depleted (S2 and S3) except for CAC3673, CAC2955 and CAC2962.

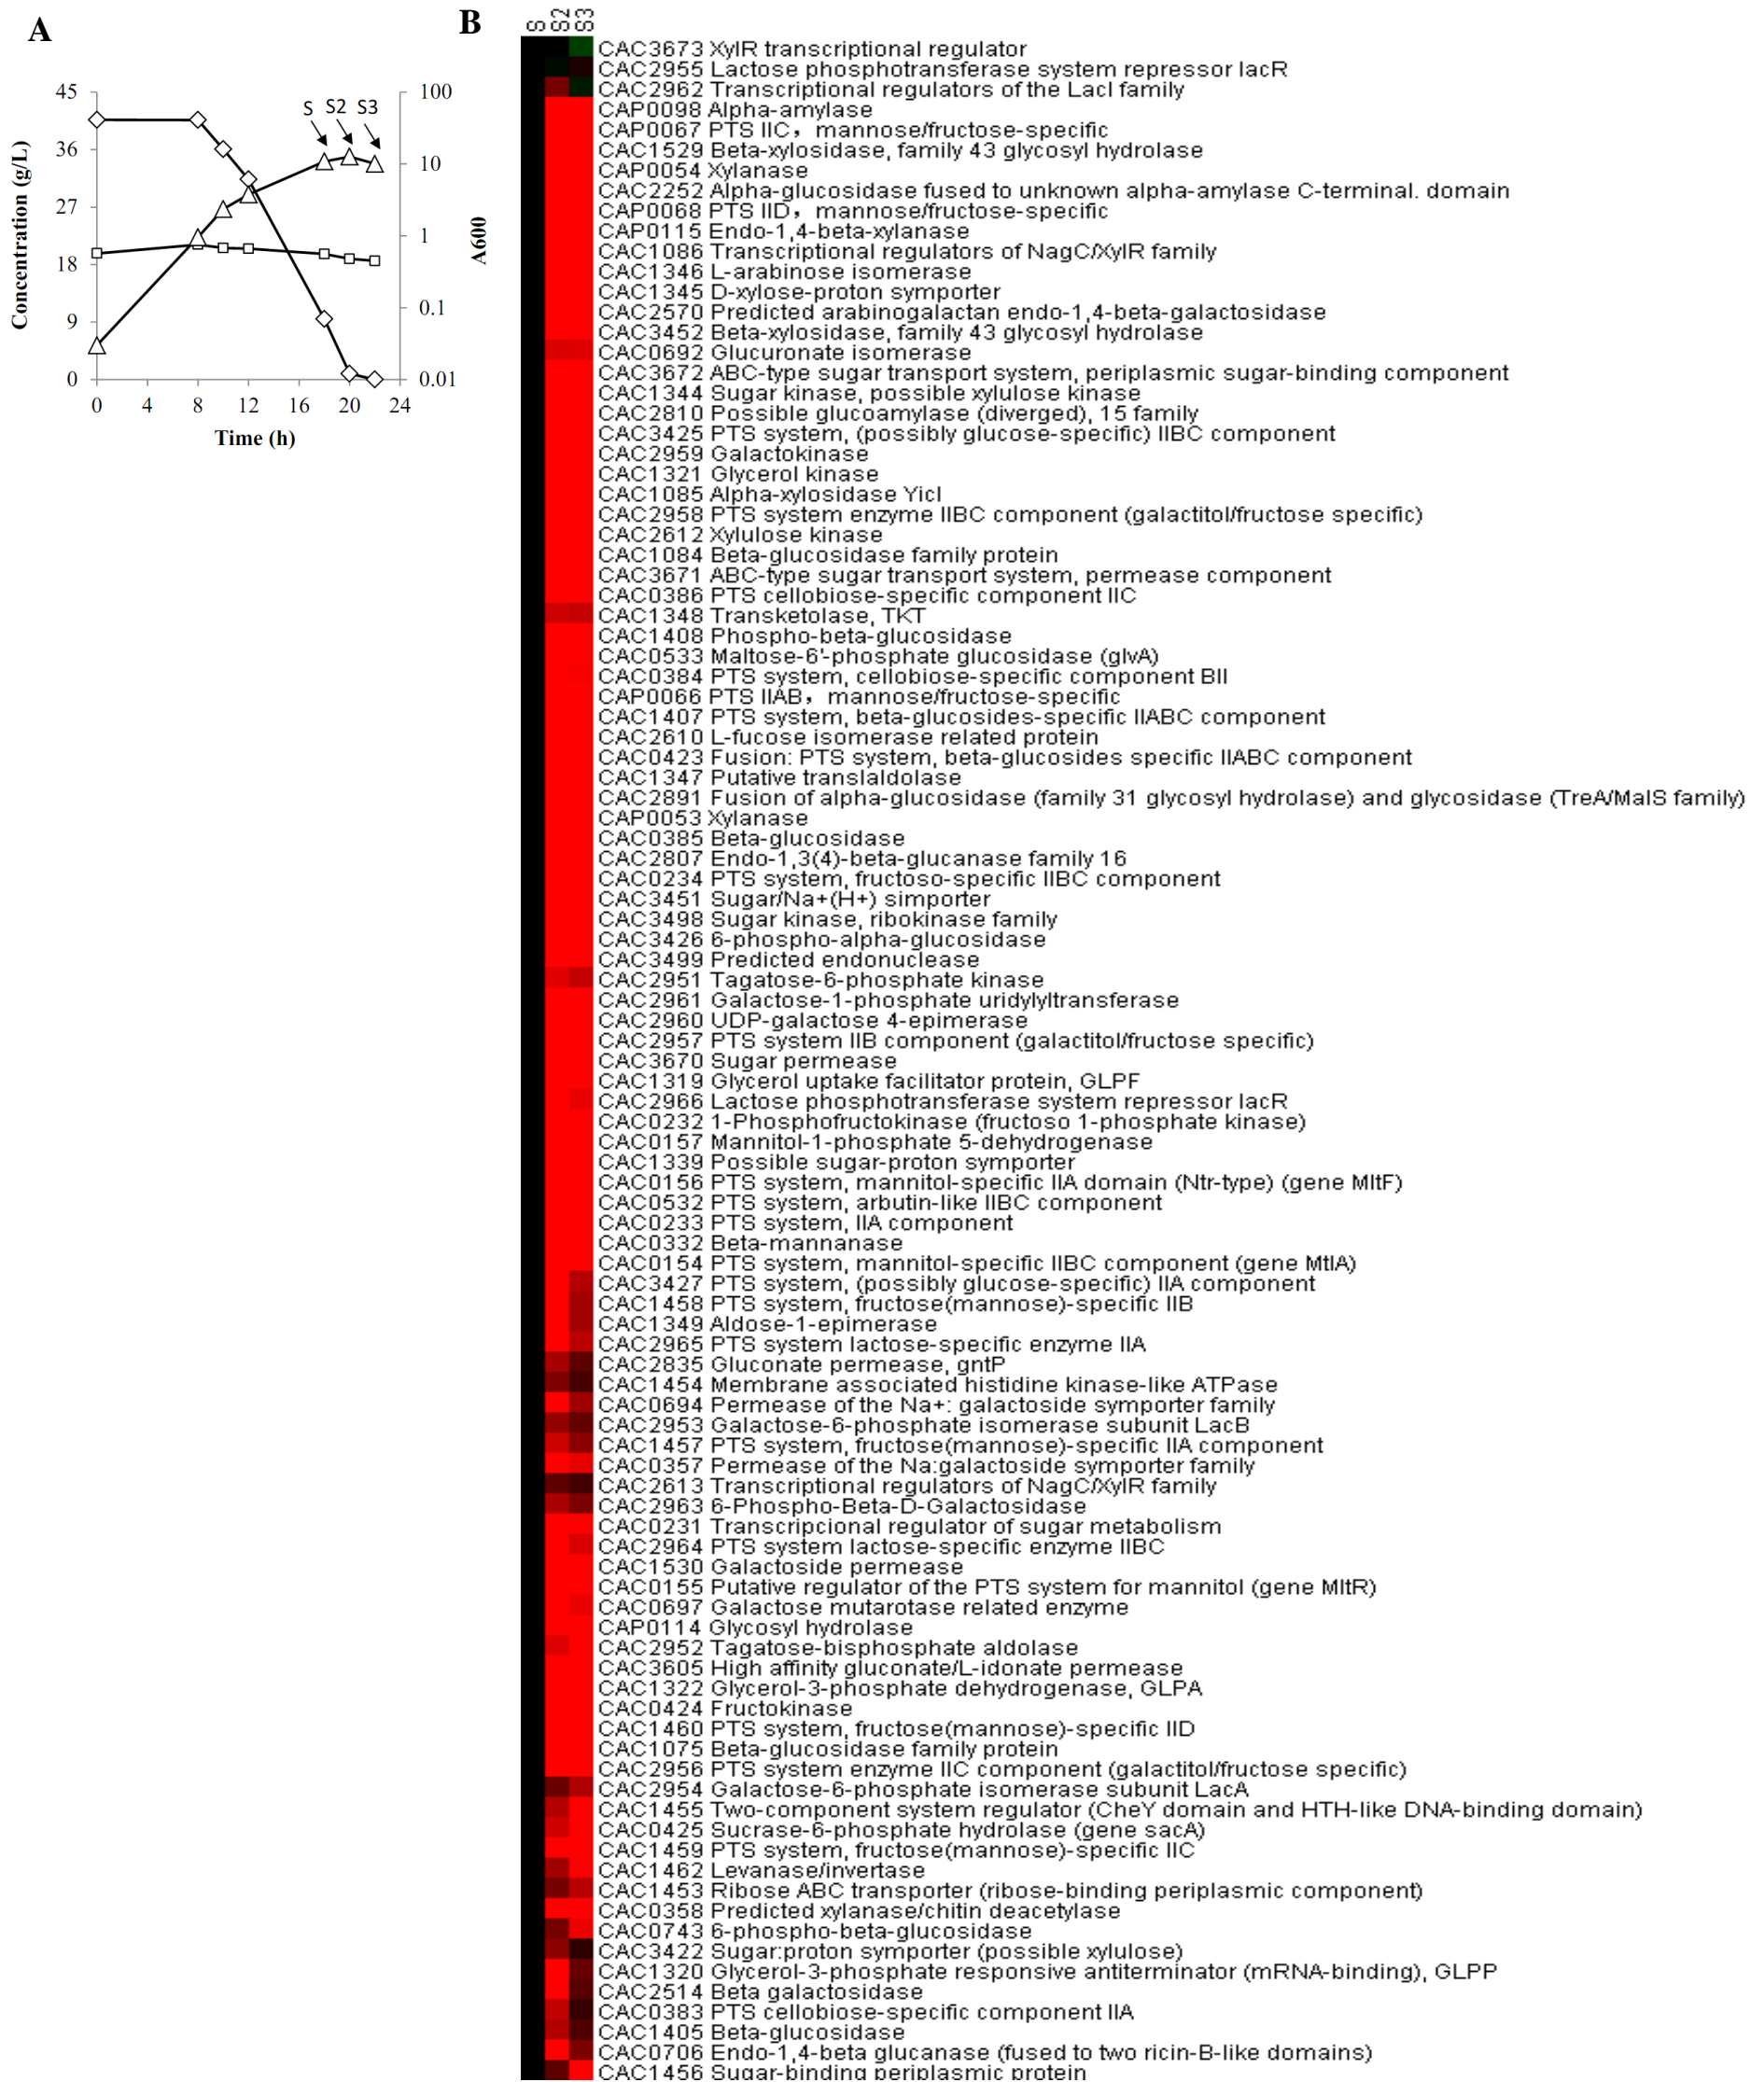

Supplement: 1471-2164-13-349-S1.pdf [file 1471-2164-13-349-S1.pdf]
