# Supplementary material for: Pleiotropic functions of catabolite control protein CcpA in Butanol-producing Clostridium acetobutylicum
Source: PubMed Central journal article supplement (PMC3507653; doi:10.1186/1471-2164-13-349), 2012-07-30
Supplement: 1471-2164-13-349-S4.pdf [file 1471-2164-13-349-S4.pdf]

**Additional file 4.** List of the up-regulated genes involved in carbohydrates metabolism after *ccpA* inactivation as well as their putative CcpA binding sites (CREs) <sup>§</sup>.

| Gene locus | Annotation                                    | Gene name    | Expression ratio (824ccpA/824WT) |       |      |                  | CcpA binding sites (CREs) |                       |       |
|------------|-----------------------------------------------|--------------|----------------------------------|-------|------|------------------|---------------------------|-----------------------|-------|
|            |                                               |              | M                                | L     | T    | S                | Sequence                  | Position <sup>†</sup> | Score |
| CAP0053    | ↑ Xylanase                                    | <i>xynB</i>  |                                  | 2.1   |      | 12.2             |                           |                       |       |
| CAP0054    | ↑ Xylanase/chitin deacetylase family protein  |              | 3.1                              | 6.5   | 2.4  | 12.9             | ttgaataccttttcaa          | -110                  | 4.4   |
|            |                                               |              |                                  |       |      | atgtaaacacattcat | -56                       | 3.2                   |       |
| CAP0066    | ↓ PTS IIAB, mannose/fructose-specific         | <i>ptnA</i>  | 32.8                             | 60.0  | 4.5  | 27.5             | atgaaaacgtattaat          | -321                  | 6.4   |
| CAP0067    | ↓ PTS IIC, mannose/fructose-specific          |              | 31.8                             | 64.3  | 4.7  | 30.0             |                           |                       |       |
| CAP0068    | ↓ PTS IID, mannose/fructose-specific          |              | 35.6                             | 55.4  | 3.9  | 26.8             |                           |                       |       |
| CAP0098    | ↓ Alpha-amylase                               | <i>amyA1</i> | 235.5                            | 410.7 | 40.9 | 783.2            | aagaaaaagcttactt          | 21                    | 2.0   |
|            |                                               |              |                                  |       |      |                  | aagtaatcgttttcaa          | 87                    | 7.0   |
| CAP0114    | ↑ Glycosyl hydrolase                          |              | 6.2                              | 5.5   | 2.2  | 6.6              |                           |                       |       |
| CAP0115    | ↑ Endo-1,4-beta-xylanase                      | <i>xynD</i>  | 6.0                              | 4.7   | 2.0  | 5.7              | gtgtaatcgattttaa          | 800                   | 3.1   |
| CAC0154    | ↑ PTS system, mannitol-specific IIBC          | <i>MtlA</i>  | 24.9                             | 18.2  | 2.7  | 16.9             | ttgaaaacgtatacca          | -112                  | 3.8   |
|            |                                               |              |                                  |       |      |                  | ttgaaaacgatcgcac          | -78                   | 4.5   |
| CAC0155    | Regulator of the PTS system for mannitol      | <i>MtlR</i>  | 11.6                             | 20.3  | 2.4  | 11.2             | atttaaatgattacaa          | 863                   | 1.9   |
| CAC0156    | PTS system, mannitol-specific IIA             | <i>MtlF</i>  | 7.4                              | 9.5   | 2.0  | 9.1              |                           |                       |       |
| CAC0157    | Mannitol-1-phosphate 5-dehydrogenase          | <i>MtlD</i>  | 9.3                              | 9.4   |      | 6.9              | ttgaaaatgaatactt          | 839                   | 2.2   |
| CAC0231    | Transcriptional regulator of sugar metabolism |              | 5.9                              | 14.0  | 4.8  | 16.2             | ttgaatccgtttacaa          | -79                   | 3.5   |
| CAC0232    | 1-Phosphofructokinase                         | <i>fruB</i>  | 10.6                             | 18.4  | 4.3  | 21.4             | ttgtagacgattttaa          | 278                   | 1.5   |
| CAC0233    | PTS system IIA, fructoso-specific             |              | 15.2                             |       | 2.5  | 25.8             | aagaaaacttatgcat          | 363                   | 1.6   |
| CAC0234    | ↓ PTS system IIBC, fructoso-specific          |              | 7.1                              | 9.7   |      | 17.6             |                           |                       |       |
| CAC0332    | Beta-mannanase                                | <i>manB</i>  | 5.7                              | 2.9   | 5.2  | 48.1             | ttgtaaacgttttat           | -158                  | 8.5   |
| CAC0357    | ↑ Permease of the Na:galactoside symporter    |              | 4.0                              | 2.8   | 2.7  | 3.2              |                           |                       |       |
| CAC0358    | ↑ Xylanase/chitin deacetylase                 |              | 3.4                              | 4.2   | 4.4  | 5.8              |                           |                       |       |

|         |                                                |             |      |      |      |      |                   |      |     |
|---------|------------------------------------------------|-------------|------|------|------|------|-------------------|------|-----|
| CAC0383 | PTS IIA, cellobiose-specific                   |             | 6.0  | 12.0 |      |      |                   |      |     |
| CAC0384 | PTS IIB, cellobiose-specific                   | <i>licB</i> | 5.8  | 13.9 | 0.5  |      |                   |      |     |
| CAC0385 | Beta-glucosidase                               |             | 4.1  | 10.2 |      |      |                   |      |     |
| CAC0386 | PTS IIC, cellobiose-specific                   | <i>licC</i> | 3.7  | 9.4  | 0.3  |      |                   |      |     |
| CAC0423 | PTS IIBCA, beta-glucosides specific            | <i>scrA</i> | 7.1  | 5.3  |      | 2.6  |                   |      |     |
| CAC0424 | Fructokinase                                   | <i>scrK</i> | 7.4  | 5.0  |      | 3.1  | ttttaatcgatttat   | 29   | 2.6 |
| CAC0425 | Sucrase-6-phosphate hydrolase                  | <i>sacA</i> | 2.8  | 2.2  |      |      |                   |      |     |
| CAC0532 | PTS system IICB, maltose specific              |             | 19.6 | 16.1 | 16.2 | 19.1 | ttgaaaaggtttctt   | -202 | 5.6 |
| CAC0533 | Maltose-6'-phosphate glucosidase               | <i>glvA</i> | 16.6 | 16.8 | 6.5  | 14.4 |                   |      |     |
| CAC0569 | Antiterminator                                 | <i>glcT</i> | 3.2  | 2.7  | 2.5  | 3.6  |                   |      |     |
| CAC0692 | Glucuronate isomerase                          | <i>uxaC</i> | 3.7  | 3.1  |      | 2.7  | gtgataacgtttactc  | -361 | 1.9 |
| CAC0694 | Na: galactoside symporter                      |             | 4.3  | 4.1  | 3.4  | 4.1  |                   |      |     |
| CAC0697 | Galactose mutarotase related enzyme            |             | 6.8  | 6.2  | 3.0  | 2.7  |                   |      |     |
| CAC0706 | Endo-1,4-beta glucanase                        |             | 6.1  | 7.4  | 5.5  | 8.0  | cagataacgtttacaa  | -76  | 3.4 |
| CAC0743 | 6-Phospho-beta-glucosidase                     |             | 3.5  | 3.2  | 3.2  | 3.0  | atgataaccttatcat  | -151 | 4.2 |
| CAC1075 | Beta-glucosidase                               |             | 5.4  | 7.0  | 4.8  | 47.7 | ttgtaaagtgttcat   | -50  | 7.3 |
| CAC1084 | Beta-glucosidase                               |             | 14.0 | 16.1 | 12.1 | 12.6 | atgtatacgatttctt  | -102 | 6.0 |
| CAC1085 | Alpha-xylosidase                               |             | 13.3 | 14.0 | 7.0  | 13.0 |                   |      |     |
| CAC1086 | NagC/XylR family transcriptional regulator     | <i>xlyR</i> | 9.2  | 10.8 | 4.9  | 12.0 |                   |      |     |
| CAC1319 | Glycerol uptake facilitator protein            | <i>glpF</i> | 32.7 | 32.1 | 52.9 | 60.0 | gagtaaacatttacat  | -311 | 3.7 |
| CAC1320 | Glycerol-3-phosphate responsive antiterminator | <i>glpP</i> | 11.3 | 14.2 | 11.9 | 7.9  |                   |      |     |
| CAC1321 | Glycerol kinase                                | <i>glpK</i> | 35.0 | 30.4 | 39.3 | 47.3 | atgtaaccgattacac  | 536  | 2.9 |
| CAC1322 | Glycerol-3-phosphate dehydrogenase             | <i>glpA</i> | 2.5  | 2.9  | 2.1  | 2.1  |                   |      |     |
| CAC1339 | Sugar-proton symporter                         | <i>araE</i> | 35.3 | 43.3 | 11.6 | 36.2 | aggtaatcgctttcat  | -150 | 4.4 |
|         |                                                |             |      |      |      |      | atgaaaacggttatata | -91  | 4.7 |

|         |                                                         |              |      |      |      |       |                  |      |     |
|---------|---------------------------------------------------------|--------------|------|------|------|-------|------------------|------|-----|
| CAC1341 | ↓ L-ribulose-5-phosphate 4-epimerase                    | <i>araD</i>  | 2.3  |      |      | 5.8   | tggtaaacgttttact | -105 | 1.5 |
| CAC1342 | ↓ L-arabinose isomerase                                 | <i>araA1</i> | 2.4  |      |      | 2.6   |                  |      |     |
| CAC1343 | Phosphoketolase                                         | <i>ptk</i>   |      |      |      | 2.9   |                  |      |     |
| CAC1344 | ↓ Ribulokinase                                          | <i>xylB</i>  | 13.0 | 12.2 | 17.5 | 49.7  | ttgcaaacgattctc  | 95   | 2.7 |
| CAC1345 | ↓ D-Xylose-proton symporter                             | <i>xylT</i>  | 71.6 | 70.2 | 33.6 | 147.4 | atgaaatcgttataaa | -61  | 5.5 |
| CAC1346 | ↓ L-Arabinose isomerase                                 | <i>araA</i>  | 41.4 | 39.2 | 20.1 | 118.1 |                  |      |     |
| CAC1347 | ↓ Translaldolase                                        | <i>tal</i>   | 6.6  | 4.7  | 3.8  | 6.9   |                  |      |     |
| CAC1348 | ↓ Transketolase                                         | <i>tkt</i>   | 5.6  | 3.7  | 3.9  | 7.9   |                  |      |     |
| CAC1349 | ↓ Aldose-1-epimerase                                    | <i>galM</i>  | 5.3  | 4.2  | 3.1  | 7.2   |                  |      |     |
| CAC1405 | ↓ Beta-glucosidase                                      | <i>bglA</i>  | 5.8  | 2.8  |      | 3.5   | atgataacgtattcga | 326  | 3.0 |
| CAC1406 | ↓ Transcriptional antiterminator (BglG family)          |              | 26.1 | 28.8 | 12.0 | 40.2  |                  |      |     |
| CAC1407 | ↓ PTS IIBCA, beta-glucosides-specific                   |              | 26.6 | 24.4 | 12.6 | 30.9  | aagaaaacgttaacag | 50   | 4.7 |
|         |                                                         |              |      |      |      |       | ttgtaaccgttatcaa | 152  | 4.6 |
| CAC1408 | ↓ Phospho-beta-glucosidase                              |              | 2.9  | 2.1  | 2.3  | 2.1   | gagaaaactatttctt | 782  | 2.4 |
| CAC1453 | ↓ Periplasmic fructose-binding protein*                 |              | 3.4  | 4.1  | 3.7  | 3.7   |                  |      |     |
| CAC1454 | ↓ Histidine kinase                                      |              | 3.3  | 4.4  | 3.7  | 4.8   | ttgtaaaccttatcat | 47   | 5.9 |
| CAC1455 | ↓ Two-component system regulator                        |              |      |      |      |       |                  |      |     |
| CAC1456 | ↓ periplasmic fructose-binding protein*                 |              | 2.1  | 2.8  | 2.1  | 2.6   |                  |      |     |
| CAC1457 | ↓ PTS IIA, fructose/mannose specific                    |              | 14.0 | 6.5  | 5.7  | 16.9  | ttgaaaacgttacia  | 158  | 3.7 |
| CAC1458 | ↓ PTS IIB, fructose/mannose specific                    |              | 14.7 | 6.3  | 5.6  | 40.9  |                  |      |     |
| CAC1459 | ↓ PTS IIC, fructose/mannose specific                    |              | 7.6  | 4.1  | 3.2  | 7.6   | atgaaaactttattta | 583  | 1.0 |
| CAC1460 | ↓ PTS IID, fructose/mannose specific                    |              | 7.1  | 3.4  | 2.6  | 7.2   |                  |      |     |
| CAC1462 | ↓ Levanase/invertase                                    |              | 5.6  | 5.3  | 6.0  | 4.2   | ttgaaaacgttttat  | -51  | 9.1 |
| CAC1529 | ↓ Alpha-L-arabinofuranosidase II precursor *            | <i>arb43</i> | 7.6  | 10.0 | 11.1 | 15.2  |                  |      |     |
| CAC1530 | ↓ Sugar-proton symporter, possibly for arabinosides [1] | <i>araT</i>  | 10.9 | 15.3 | 14.6 | 22.0  | ttgtaagcgttatcac | 1169 | 2.3 |
| CAC2252 | ↓ Alpha-glucosidase                                     |              | 17.0 | 28.4 | 11.9 | 296.2 | gtgaaatcgattgcaa | -84  | 3.7 |

|         |                                             |             |      |       |      |       |  |                  |      |     |
|---------|---------------------------------------------|-------------|------|-------|------|-------|--|------------------|------|-----|
|         |                                             |             |      |       |      |       |  | atgaaaacgatatcta | 121  | 6.8 |
| CAC2018 | Aldehyde:ferredoxin oxidoreductase          |             | 4.2  | 4.4   | 3.2  | 2.7   |  |                  |      |     |
| CAC2514 | Beta galactosidase                          |             | 38.9 | 46.3  | 15.0 | 69.9  |  | attaaaaggaattcat | 156  | 1.0 |
|         |                                             |             |      |       |      |       |  | atgaaaacgtttata  | 947  | 6.3 |
| CAC2570 | Arabinogalactan endo-1,4-beta-galactosidase | <i>ganA</i> | 5.8  | 6.8   | 3.3  | 11.0  |  | tagaaaacgatttctt | -56  | 7.9 |
| CAC2610 | Xylose isomerase                            | <i>xlyA</i> | 35.6 | 49.0  | 6.6  | 52.4  |  |                  |      |     |
| CAC2611 | Hypothetical protein                        |             | 35.2 | 40.5  | 7.4  | 27.2  |  |                  |      |     |
| CAC2612 | Xylulose kinase                             | <i>xylB</i> | 26.9 | 30.3  | 6.1  | 17.9  |  | atgaaaagtttacia  | -104 | 5.9 |
| CAC2613 | Glucokinase*                                | <i>glcK</i> | 2.6  | 2.7   | 2.3  | 2.8   |  | attaaaacggttactt | 634  | 1.8 |
| CAC2807 | Endo-1,3(4)-beta-glucanase                  |             | 5.7  | 11.2  | 4.1  | 11.2  |  |                  |      |     |
| CAC2810 | Glucoamylase                                |             | 11.7 | 23.7  | 7.7  | 98.7  |  | atgataacggttacia | 1340 | 3.4 |
| CAC2835 | Galactose permease                          | <i>gntP</i> | 93.9 | 143.6 | 49.3 | 321.9 |  | aagaaaacgttaccgt | -32  | 2.4 |
| CAC2891 | Alpha-glucosidase                           |             | 3.5  | 6.9   | 2.8  | 9.8   |  | gtgaaaacgtttaata | -123 | 3.8 |
|         |                                             |             |      |       |      |       |  | gggaaaacgattgcat | -73  | 3.5 |
| CAC2951 | Tagatose-6-phosphate kinase                 | <i>lacC</i> |      | 2.1   |      |       |  |                  |      |     |
| CAC2952 | Tagatose-bisphosphate aldolase              | <i>gatY</i> |      | 2.1   |      |       |  |                  |      |     |
| CAC2953 | Galactose-6-phosphate isomerase subunit B   | <i>lacB</i> |      | 2.6   | 2.0  | 2.2   |  |                  |      |     |
| CAC2954 | Galactose-6-phosphate isomerase subunit A   | <i>lacA</i> |      | 2.5   | 2.1  | 2.4   |  |                  |      |     |
| CAC2955 | Lactose phosphotransferase system repressor | <i>lacR</i> |      | 2.3   | 3.5  | 3.7   |  |                  |      |     |
| CAC2956 | PTS IIC, galactose specific                 |             | 6.8  | 7.3   | 7.1  | 11.4  |  | atgtatacgttatttt | 298  | 2.4 |
|         |                                             |             |      |       |      |       |  | ttgtaaatgttataat | 332  | 2.7 |
| CAC2957 | PTS IIB, galactose specific                 |             | 7.9  | 17.6  | 8.6  | 25.1  |  |                  |      |     |
| CAC2958 | PTS IIA, galactose specific                 |             | 4.6  | 5.7   | 4.7  | 9.1   |  | tagtaatcgcttacgt | -315 | 2.6 |
|         |                                             |             |      |       |      |       |  | atgtaaacgaaatcat | -89  | 6.3 |

|         |                                             |                 |       |       |      |       |                   |      |     |
|---------|---------------------------------------------|-----------------|-------|-------|------|-------|-------------------|------|-----|
| CAC2959 | Galactokinase                               | <i>galK</i>     | 13.2  | 9.7   | 3.0  | 9.3   | atgatttcgtttacat  | -387 | 4.1 |
|         |                                             |                 |       |       |      |       | tagtaatcgattacta  | -40  | 3.8 |
|         |                                             |                 |       |       |      |       | atgaaaatgttttctt  | 56   | 6.2 |
| CAC2960 | UDP-galactose 4-epimerase                   | <i>galE</i>     | 5.8   | 5.3   | 3.1  | 8.2   |                   |      |     |
| CAC2961 | Galactose-1-phosphate uridylyltransferase   | <i>galT</i>     | 2.0   | 2.0   | 2.0  | 4.6   |                   |      |     |
| CAC2962 | Transcriptional regulator                   |                 |       |       |      | 3.0   |                   |      |     |
| CAC2963 | 6-Phospho-Beta-D-Galactosidase              | <i>lacG</i>     | 2.4   | 2.4   | 2.2  | 2.1   |                   |      |     |
| CAC2964 | PTS system lactose-specific enzyme IIBC     | <i>lacE</i>     | 4.7   | 3.8   | 2.9  | 3.3   |                   |      |     |
| CAC2965 | PTS system lactose-specific enzyme IIA      | <i>lacF</i>     | 12.6  | 6.7   | 6.2  | 10.0  |                   |      |     |
| CAC2966 | Lactose phosphotransferase system repressor | <i>lacR</i>     |       | 2.0   | 2.8  |       | atgtaaacgaaaacaa  | -134 | 4.8 |
|         |                                             |                 |       |       |      |       | tagaaaacgataacta  | -77  | 4.8 |
| CAC3422 | Sugar:proton symporter ,possible xylulose   |                 | 8.4   | 9.1   | 4.7  | 4.5   |                   |      |     |
| CAC3425 | PTS system, IIBC component                  | <i>glvC</i>     | 25.0  | 25.0  | 7.0  | 25.9  | aagtaaacattttcac  | -92  | 3.1 |
|         |                                             |                 |       |       |      |       | cattaatcgtttacct  | 260  | 1.0 |
| CAC3426 | 6-Phospho-alpha-glucosidase                 | <i>glvG</i>     | 5.4   | 4.7   | 4.2  | 11.0  | atgaaaaagtattcaa  | 1    | 3.8 |
| CAC3427 | PTS system, IIA component                   |                 | 2.1   | 2.0   | 2.3  | 5.0   | aggaaaacttttaaata | 63   | 1.7 |
| CAC3451 | Sugar/Na(H) simporter                       | <i>XynT</i>     | 52.9  | 113.7 | 14.9 | 199.7 | ttgaaaaagtttgat   | -69  | 2.2 |
|         |                                             |                 |       |       |      |       | atgtaataattacaa   | -35  | 1.4 |
| CAC3452 | Beta-xylosidase                             | <i>xynB [2]</i> | 43.2  | 100.5 | 14.1 | 189.5 |                   |      |     |
| CAC3498 | Fructoselysine kinase*                      |                 | 27.4  | 19.7  | 5.9  | 46.6  | atgaaaacgattttga  | 329  | 4.8 |
| CAC3499 | Endonuclease                                |                 | 26.3  | 22.1  | 8.2  | 47.4  |                   |      |     |
| CAC3500 | anaerobic C4-dicarboxylate transporter      | <i>dcuB</i>     | 13.61 | 13.61 | 8.50 | 19.33 | ttgaaaacgatttgat  | -261 | 5.9 |
| CAC3605 | High affinity glucxonate/L-idonate permease | <i>gntP</i>     | 10.3  | 4.8   | 2.2  | 3.9   | tttaaacgttttgat   | 588  | 3.4 |
|         |                                             |                 |       |       |      |       |                   | 62   | 2.7 |

|         |                                                      |             |       |       |      |       |                  |     |     |
|---------|------------------------------------------------------|-------------|-------|-------|------|-------|------------------|-----|-----|
| CAC3670 | ↑ Sugar permease                                     | <i>amyC</i> | 95.3  | 94.1  | 33.6 | 141.2 |                  |     |     |
| CAC3671 | ABC transporter, permease component                  | <i>amyD</i> | 158.3 | 163.4 | 46.5 | 295.8 | atgataacgatttctc | 206 | 3.8 |
| CAC3672 | ABC transporter, periplasmic sugar-binding component | <i>msmE</i> | 98.7  | 71.2  | 41.7 | 126.5 | atgtaaacgattaat  | -45 | 7.8 |

### Notes:

<sup>§</sup> The arrows indicate the transcription direction of the predicted operon obtained from DOOR database [3, 4], except for CAC1344-CAC1349 and CAC2610-CAC2612, which were identified to be one transcriptional unit by Zhang *et al.* [1] and this study (data not shown), respectively.

<sup>†</sup> The +1 position is defined as the first nucleotide of coding sequence.

\* Annotated in SEED annotation system [5].

### References

1. Zhang L, Leyn SA, Gu Y, Jiang W, Rodionov DA, Yang C: **Ribulokinase and transcriptional regulation of arabinose metabolism in *Clostridium acetobutylicum***. *Journal of bacteriology* 2012, **194**(5):1055-1064.
2. Gu Y, Ding Y, Ren C, Sun Z, Rodionov DA, Zhang W, Yang S, Yang C, Jiang W: **Reconstruction of xylose utilization pathway and regulons in Firmicutes**. *BMC Genomics* 2010, **11**:255.
3. Mao F, Dam P, Chou J, Olman V, Xu Y: **DOOR: a database for prokaryotic operons**. *Nucleic Acids Res* 2009, **37**(Database issue):D459-463.
4. Dam P, Olman V, Harris K, Su ZC, Xu Y: **Operon prediction using both genome-specific and general genomic information**. *Nucleic Acids Research* 2007, **35**(1):288-298.
5. Overbeek R, Begley T, Butler RM, Choudhuri JV, Chuang HY, Cohoon M, de Crecy-Lagard V, Diaz N, Disz T, Edwards R *et al*: **The subsystems approach to genome annotation and its use in the project to annotate 1000 genomes**. *Nucleic Acids Res* 2005, **33**(17):5691-5702.
