# Supplementary material for: Pleiotropic functions of catabolite control protein CcpA in Butanol-producing Clostridium acetobutylicum
Source: PubMed Central journal article supplement (PMC3507653; doi:10.1186/1471-2164-13-349), 2012-07-30
Supplement: 1471-2164-13-349-S5.pdf [file 1471-2164-13-349-S5.pdf]

**Additional file 5.** List of the down-regulated genes involved in carbohydrates metabolism after *ccpA* inactivation and their putative CcpA binding sites (CREs) <sup>§</sup>

| Gene locus | Annotation                                   | Gene name   | Expression ratio (824 <i>ccpA</i> /824WT) |      |      |      | CcpA-binding sites (CREs) |                       |       |
|------------|----------------------------------------------|-------------|-------------------------------------------|------|------|------|---------------------------|-----------------------|-------|
|            |                                              |             | M                                         | L    | T    | S    | Sequence                  | Position <sup>†</sup> | Score |
| CAC0539    | Mannanase-like protein, contains ChW-repeats | <i>manB</i> | 0.11                                      | 0.14 | 0.22 | 0.17 |                           |                       |       |
| CAC0540    |                                              |             |                                           |      |      |      |                           |                       |       |
| CAC0570    | PTS IIBC, glucose specific                   | <i>glcG</i> | 0.16                                      | 0.20 | 0.11 | 0.19 |                           |                       |       |
| CAC1351    | Periplasmic sugar-binding protein            |             | 0.21                                      | 0.30 | 0.22 |      |                           |                       |       |
| CAC1353    | PTS IICB, glucose specific                   |             | 0.07                                      | 0.07 | 0.11 | 0.20 | ttgtaaacgatgtaa           | -219                  | 1.7   |
| CAC1354    | PTS IIA, glucose specific                    |             | 0.25                                      | 0.44 |      |      | tttacatcgttacaa           | -214                  | 1.7   |
| CAC2237    | Glucose-1-phosphate adenylyltransferase      | <i>glgC</i> | 0.44                                      | 0.37 | 0.43 | 0.34 |                           |                       |       |
| CAC2238    |                                              |             |                                           |      |      |      |                           |                       |       |
| CAC2239    | Glycogen synthase                            | <i>glgA</i> |                                           | 0.39 | 0.47 | 0.48 |                           |                       |       |
| CAC2240    | Cyclomaltodextrin glucanotransferase         |             |                                           | 0.44 | 0.39 | 0.48 |                           |                       |       |
| CAC3087    | Phosphoenolpyruvate-protein kinase           | <i>ptsI</i> | 0.32                                      |      | 0.11 | 0.17 |                           |                       |       |

**Notes:**

<sup>§</sup>The black arrows indicate the transcription direction of the predicted operon obtained from DOOR database [1, 2].

<sup>†</sup>The +1 position is defined as the first nucleotide of coding sequence.

## References

1. Mao F, Dam P, Chou J, Olman V, Xu Y: **DOOR: a database for prokaryotic operons.** *Nucleic Acids Res* 2009, **37**:D459-463.
2. Dam P, Olman V, Harris K, Su ZC, Xu Y: **Operon prediction using both genome-specific and general genomic information.** *Nucleic Acids Research* 2007, **35**:288-298.
