# Supplementary material for: Pleiotropic functions of catabolite control protein CcpA in Butanol-producing Clostridium acetobutylicum
Source: PubMed Central journal article supplement (PMC3507653; doi:10.1186/1471-2164-13-349), 2012-07-30
Supplement: 1471-2164-13-349-S6.pdf [file 1471-2164-13-349-S6.pdf]

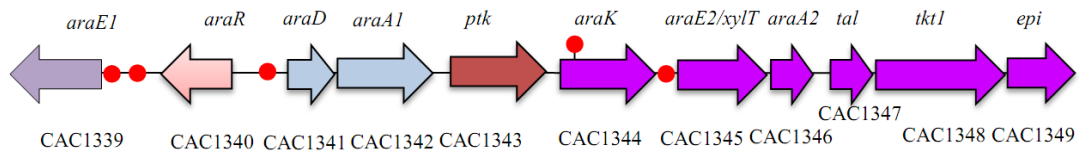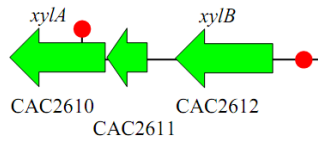

● CcpA binding site (CRE)

**Additional file 6.** Genomic organization of genes involved in pentose utilization and the corresponding binding loci of CcpA. Genes (shown by arrows) from the same operon are marked in the same colors. The binding sites of CcpA are shown by red circles.
