# Supplementary material for: Pleiotropic functions of catabolite control protein CcpA in Butanol-producing Clostridium acetobutylicum
Source: PubMed Central journal article supplement (PMC3507653; doi:10.1186/1471-2164-13-349), 2012-07-30
Supplement: 1471-2164-13-349-S8.pdf [file 1471-2164-13-349-S8.pdf]

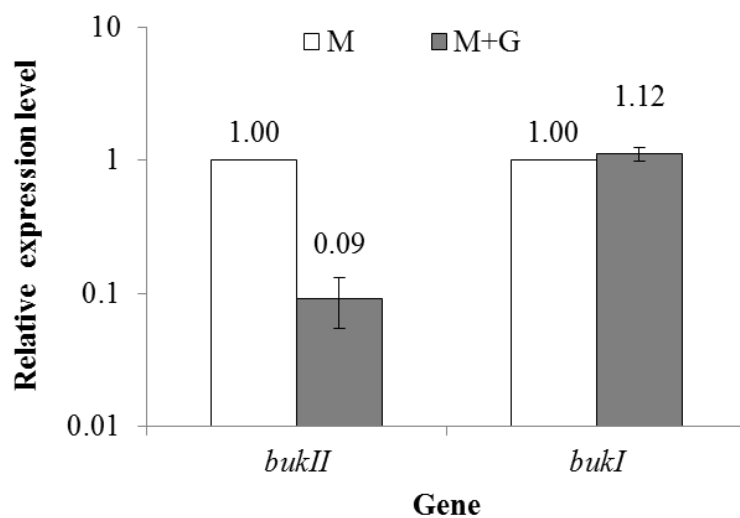

**Additional file 8.** Quantitative RT-PCR analysis to assess the impact of D-glucose on the expression of *bukII* (CAC1660) and *bukI* (CAC3075) in *C. acetobutylicum* ATCC 824. Cells were harvested from SMP2 medium with 20 g/L D-glucose (M+G) or without D-glucose (M) at late exponential phase ( $A_{600} = 2.0$ ).
