# Supplementary material for: Pleiotropic functions of catabolite control protein CcpA in Butanol-producing Clostridium acetobutylicum
Source: PubMed Central journal article supplement (PMC3507653; doi:10.1186/1471-2164-13-349), 2012-07-30
Supplement: 1471-2164-13-349-S9.pdf [file 1471-2164-13-349-S9.pdf]

**Additional file 9.** Primers used in this study.

| Primer name     | Sequence (5'-3')                        | Description                                                              |
|-----------------|-----------------------------------------|--------------------------------------------------------------------------|
| Psol(EMSA)-for  | AGCCAGTGGCGATAAGTAGGAAAAGCTGCTAAATG     | forward EMSA probe primer for promoter of <i>sol</i> operon (CAP0162-64) |
| Psol(EMSA)-rev  | AGCCAGTGGCGATAAGAAATATACACTTCTTTCTAAAAT | reverse EMSA probe primer for promoter of <i>sol</i> operon (CAP0162-64) |
| PxylB(EMSA)-for | AGCCAGTGGCGATAAGAAAGACTGCTCGAAAATT      | forward EMSA probe primer for promoter of <i>xylB</i> (CAC2612)          |
| PxylB(EMSA)-rev | AGCCAGTGGCGATAAGGCTGTCTTGGTTCCCTGAT     | reverse EMSA probe primer for promoter of <i>xylB</i> (CAC2612)          |
| ParaE(EMSA)-for | AGCCAGTGGCGATAAGCACATAAATATTATGATTTAT   | forward EMSA probe primer for promoter of <i>araE</i> (CAC1339)          |
| ParaE(EMSA)-rev | AGCCAGTGGCGATAAGAAGCTCCTCCTTAAGATT      | reverse EMSA probe primer for promoter of <i>araE</i> (CAC1339)          |
| CAC1790-for     | AGCCAGTGGCGATAAGGGGGTTGAATCCATCTA       | forward primer for non-specific competitor in EMSA analysis              |
| CAC1790-rev     | AGCCAGTGGCGATAAGAAAGCTACCTTGCCATC       | reverse primer for non-specific competitor in EMSA analysis              |
| Cy5-tag primer  | Cy5-AGCCAGTGGCGATAAG                    | universal primer for adding Cy5 tag                                      |
| CAC3037-for     | CGGGATCCATGGCTGCCTCTATTAAG              | forward primer for expression of CcpA in <i>E.coli</i>                   |
| CAC3037-rev     | CCCTCGAGTTTTGCGTGAGGGTTTTAC             | reverse primer for expression of CcpA in <i>E.coli</i>                   |
| qCAC1345-for    | AGCTGTAGGTGGAGCTTCTGCTTT                | forward qRT-PCR primer for <i>xylT</i> (CAC1345)                         |
| qCAC1345-rev    | TCCAACGCCATCCTTCAAATGCAC                | reverse qRT-PCR primer for <i>xylT</i> (CAC1345)                         |
| qCAC2612-for    | AGTAAGTGGTGGAGGTG                       | forward qRT-PCR primer for <i>xylB</i> (CAC2612)                         |
| qCAC2612-rev    | ATTGCTACGCCAAGTGC                       | reverse qRT-PCR primer for <i>xylB</i> (CAC2612)                         |
| qCAC1348-for    | AATGCTGTGGGAATGGCAATAGCG                | forward qRT-PCR primer for <i>tkl</i> (CAC1348)                          |
| qCAC1348-rev    | TGCAAGAGAAGTTCCTCTCCTGA                 | reverse qRT-PCR primer for <i>tkl</i> (CAC1348)                          |
| qCAC1941-fw     | GGAATAGTAAGAAAATTGGATAG                 | forward qRT-PCR primer for <i>abrB1941</i> (CAC1941)                     |
| qCAC1941-rev    | GCTTCACCGCAGAACAC                       | reverse qRT-PCR primer for <i>abrB1941</i> (CAC1941)                     |
| qCAC1660-for    | TGGAGGTATAGCCTACAATAAG                  | forward qRT-PCR primer for <i>bukII</i> (CAC1660)                        |
| qCAC1660-rev    | CCTTCTGCTAGTGCTAACAT                    | reverse qRT-PCR primer for <i>bukII</i> (CAC1660)                        |
| qCAC3319-for    | AGAAGCGGAGGTACAGG                       | forward qRT-PCR primer for orphan kinase CAC3319                         |
| qCAC3319-rev    | TTGGATTTGCTATGGGT                       | reverse qRT-PCR primer for orphan kinase CAC3319                         |

|              |                           |                                                          |
|--------------|---------------------------|----------------------------------------------------------|
| qCAC3673-for | CTGGAATAGTGATTGAGGGACAGC  | forward qRT-PCR primer for <i>xylR</i> (CAC3673)         |
| qCAC3673-rev | AGATGCATACATTTCCCAGCACCC  | reverse qRT-PCR primer for <i>xylR</i> (CAC3673)         |
| qCAC2966-for | TTTGAGGAGCTTTCACCAAGTG    | forward qRT-PCR primer for <i>lacR</i> (CAC2966)         |
| qCAC2966-rev | CCTTTATAAGACCTGCTGCTAGCCT | reverse qRT-PCR primer for <i>lacR</i> (CAC2966)         |
| qCAC3647-fw  | AGAACATTAGAAATAGCAGAG     | forward qRT-PCR primer for <i>abrB3647</i> (CAC3647)     |
| qCAC3647-rev | GCATCTCCACAGAAAATAC       | reverse qRT-PCR primer for <i>abrB3647</i> (CAC3647)     |
| qCAC1653-for | AGCATCCACCTGAAATG         | forward qRT-PCR primer for glycosyltransferase CAC1653   |
| qCAC1653-rev | TTACCTCCAAGCACAAA         | reverse qRT-PCR primer for glycosyltransferase CAC1653   |
| qCAP0164-for | ACGGAATAGTTGGAATGGGCGCTA  | forward qRT-PCR primer for <i>sol</i> operon(CAP0162-64) |
| qCAP0164-rev | TGTGCCGTCAGGAAGTACTGTTGT  | reverse qRT-PCR primer for <i>sol</i> operon(CAP0162-64) |
| qCAC0103-fw  | TTTTAGGGAAAGATTTTGTAGAG   | forward qRT-PCR primer for <i>cysC</i> (CAC0103)         |
| qCAC0103-rev | TATGCCTTTTGGGTCTCG        | reverse qRT-PCR primer for <i>cysC</i> (CAC0103)         |
| qCAC0570-for | AAGGTGCTTGAAGCTATAGGCGGA  | forward qRT-PCR primer for glucose-PTS system CAC0570    |
| qCAC0570-rev | CTGTCATTACTCCAGCTGCTCCAA  | reverse qRT-PCR primer for glucose-PTS system CAC0570    |
| qCAC0310-fw  | TTTATGTAGATGGTGAGCAA      | forward qRT-PCR primer for <i>abrB310</i> (CAC0310)      |
| qCAC0310-rev | ATAGTTGATAACATCGCTTG      | reverse qRT-PCR primer for <i>abrB310</i> (CAC0310)      |
| qCAC1340-fw  | TGGAGGACACGCTTTATTC       | forward qRT-PCR primer for <i>araR</i> (CAC1340)         |
| qCAC1340-rev | TATGAGGCATTTAGGGTTAC      | reverse qRT-PCR primer for <i>araR</i> (CAC1340)         |
| qCAC1341-fw  | TTCACCTTGGGCTACATC        | forward qRT-PCR primer for <i>araD</i> (CAC1341)         |
| qCAC1341-rev | CTGGAACATCATTTGGG         | reverse qRT-PCR primer for <i>araD</i> (CAC1341)         |
| qCAC1343-fw  | CCAGCAGATGCCAATACC        | forward qRT-PCR primer for <i>ptk</i> (CAC1343)          |
| qCAC1343-rev | TTACTTGCCCAATCCCAAATG     | reverse qRT-PCR primer for <i>ptk</i> (CAC1343)          |

---
